# Supplementary material
Source: PubMed Central journal article supplement (PMC4801947)
Supplement: EMBJ-35-668-s001.pdf [file EMBJ-35-668-s001.pdf]

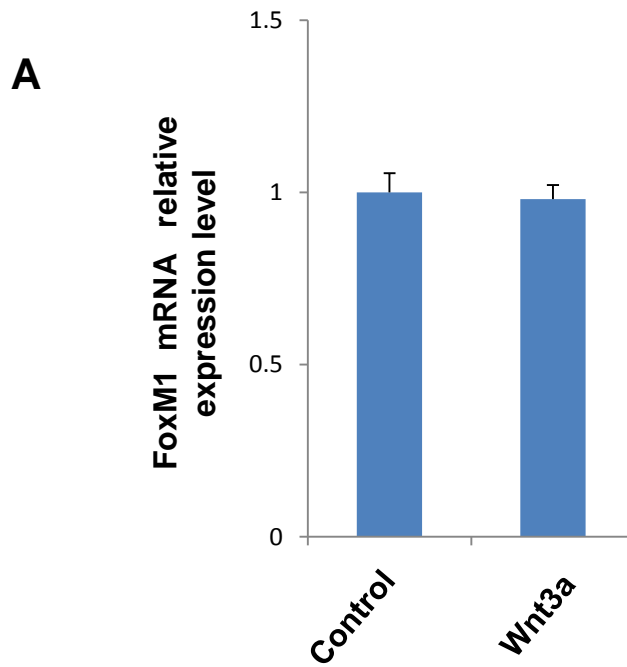

**Appendix Figure S1. Wnt regulates the stability of FoxM1 related to Figure 1**  
(A) U87 cells were treated with Wnt3a (50 ng/ml) or control PBS for 6 hr, and FoxM1 expression levels were determined by real-time RT-PCR.

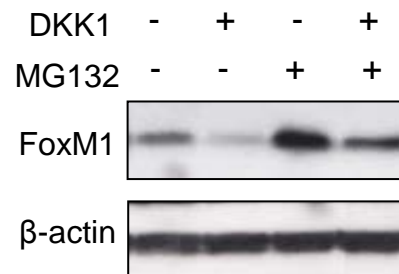

**Appendix Figure S2. Ubiquitin proteasome pathway is involved in Wnt signaling-mediated FoxM1 stability, related to Figure 2**

LN229 cells were treated with Wnt inhibitor DKK1 (100 ng/ml) and/or MG132 (25 nM) for 4 hr. Levels of FoxM1 in the cells were then analyzed by Western blotting.

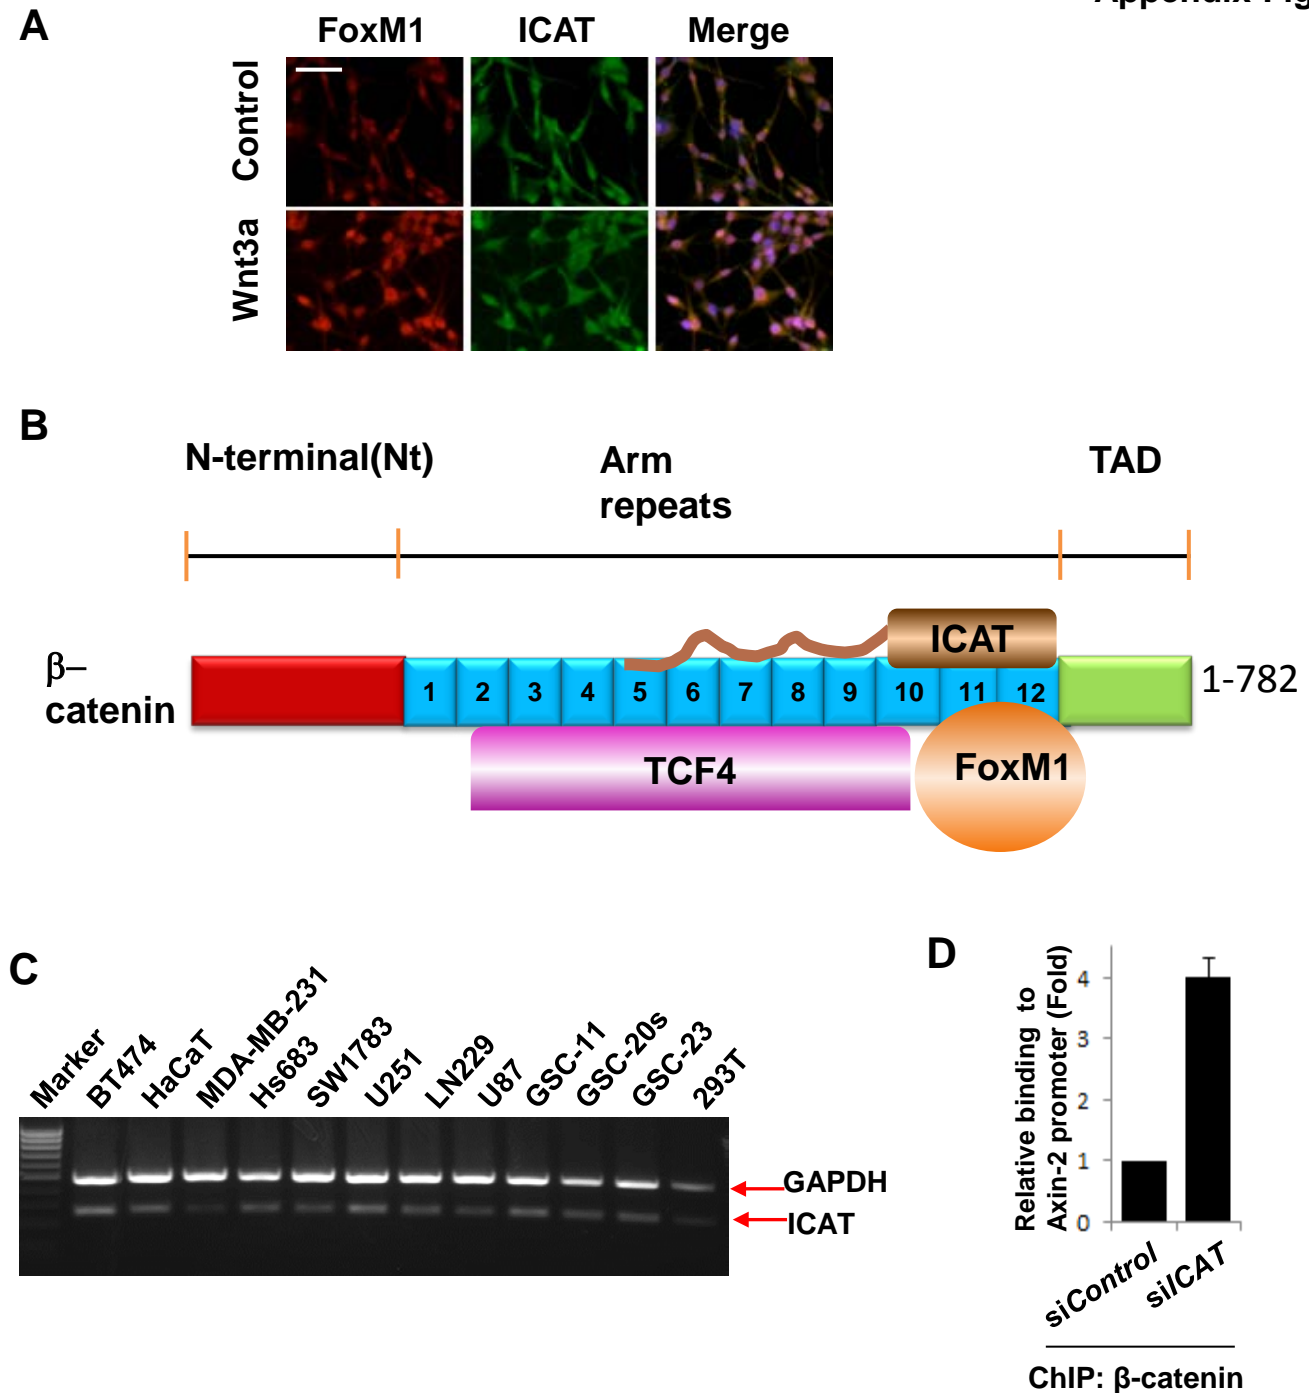

**Appendix Figure S3. Wnt promotes FoxM1 nuclear localization, ICAT expression in human cell lines, and ICAT inhibits the recruitment of  $\beta$ -catenin to the TBE, related to Figure 5**

(A) FoxM1 nuclear expression levels were detected by using IF (FoxM1, Red; ICAT, green; and nucleus, blue) in U87 cells treated with or without Wnt 3a (100 ng/ml). Scale bar: 50  $\mu$ m.

(B) Schematic of the  $\beta$ -catenin domains, which interact with TCF4, ICAT, or FoxM1.

(C) Expression of ICAT in human cell lines was examined by RT-PCR, and GAPDH was used as an internal control.

(D) ChIP analyses of endogenous  $\beta$ -catenin binding at the TCF-binding site of the *Axin2* promoter were performed in ICAT siRNA- or control siRNA- transfected LN229 cells as described in Figure 5H.

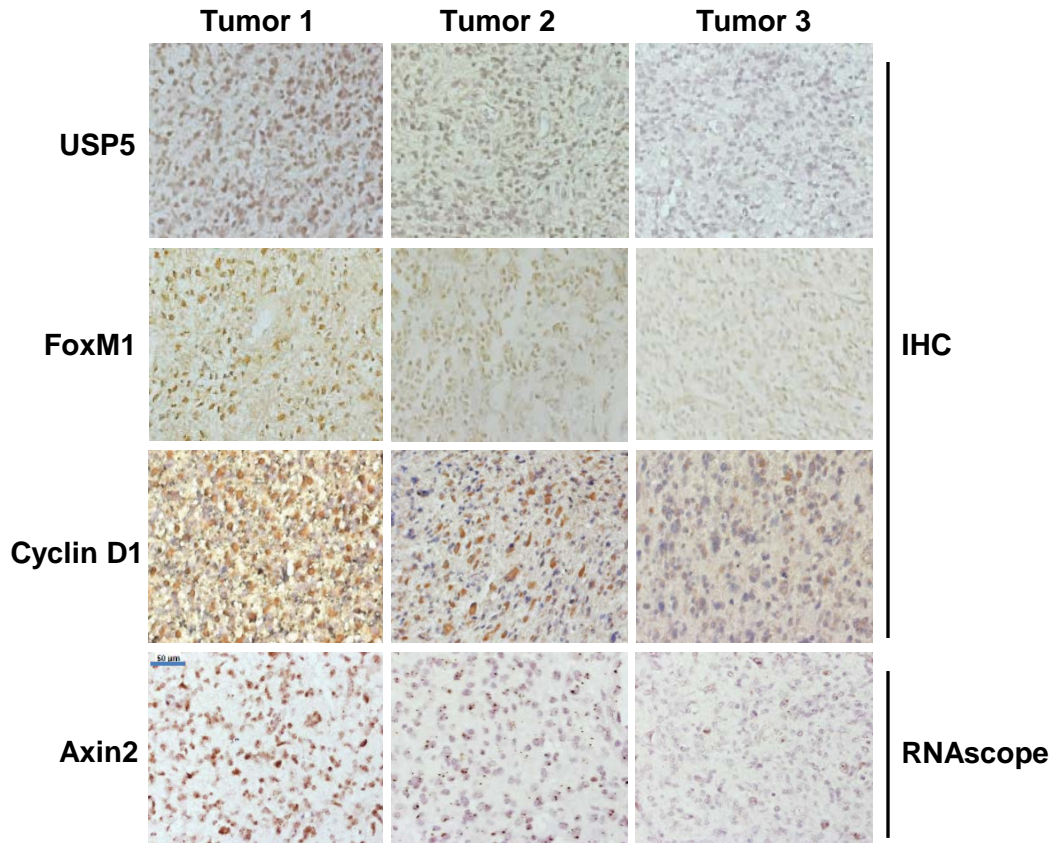

**Appendix Figure. S4. FoxM1 and Cyclin D1 expression in human GBM correlates with levels of USP5, related to Figure 7**

Panel 1-3: Expression of FoxM1, USP5, or Cyclin D1 in 50 GBM specimens was examined via IHC staining by using the indicated antibodies. Representative photos of three GBM tumors are shown.

Panel 4: Axin2 mRNA levels were examined through RNAscope in 50 GBM specimens. Representative photos of three GBM tumors are shown.

Scale bar: 50  $\mu$ m

## List of Antibodies

| Antigen             | Catalog number | Source         | Application |
|---------------------|----------------|----------------|-------------|
| Axin                | 2087s          | Cell Signaling | IP, WB      |
| $\alpha$ -Tubulin   | sc-69969       | Santa Cruz     | WB          |
| $\beta$ -actin      | sc-47778       | Santa Cruz     | WB          |
| $\beta$ -catenin    | sc-7963        | Santa Cruz     | WB          |
| Flag                | F1804          | Sigma-Aldrich  | IP          |
| Flag                | F7425          | Sigma-Aldrich  | WB          |
| GAPDH               | SC-32233       | Santa Cruz     | WB          |
| GSK3 $\alpha/\beta$ | 05-903         | Millipore      | WB          |
| GSK3 $\beta$        | 9832S          | Cell Signaling | WB          |
| HA                  | 05-904         | Millipore      | IP, WB      |
| Lamin B             | sc-6216        | Santa Cruz     | WB          |
| MYC                 | 2276s          | Cell Signaling | IP, WB      |
| ICAT                | ab129011       | Abcan          | IP, WB      |
| ICAT                | sc-99240       | Santa Cruz     | IHC, IP, WB |
| ICAT                | AF3016         | Novus          | IF          |
| FoxM1               | ab83097        | Abcan          | IF, IHC     |
| FoxM1               | Sc-500         | Santa Cruz     | IP, WB      |
| Cyclin D1           | 2978           | Cell Signaling | WB, IHC     |
| USP5                | sc-366624      | Santa Cruz     | IHC, IP, WB |
